# Supplementary material for: Reappraisal of Human HOG and MO3.13 Cell Lines as a Model to Study Oligodendrocyte Functioning
Source: PubMed Central journal article supplement (PMC6769895; doi:10.3390/cells8091096), 2019-09-17
Supplement: cells-08-01096-s001.pdf [file cells-08-01096-s001.pdf]

# Supplementary figures and tables

De Kleijn et al. (2019)

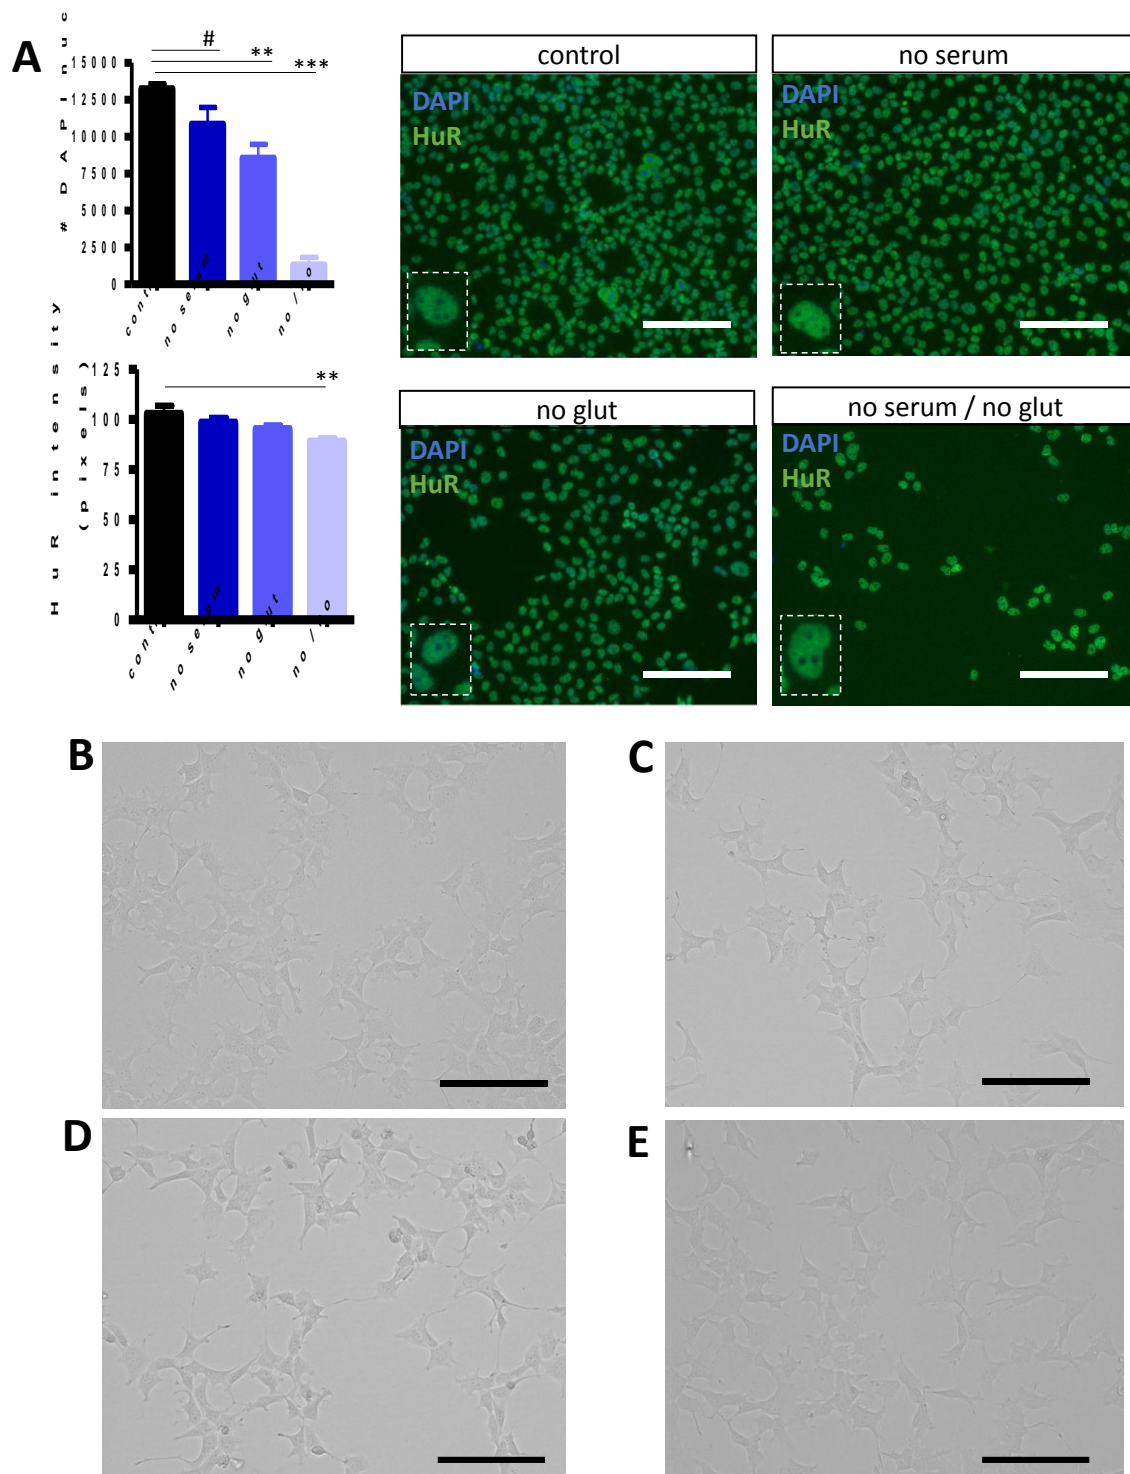

**Figure S1.** (A) HOG cell count (#DAPI nuclei), cytoplasmic HuR intensity quantifications and representative immunocytochemistry images of HOG cells cultured without serum, without Glutamax (glutamine) and without serum and Glutamax. Based on ANOVA with Tukey-b post-hoc comparisons on four independent experiments (n=4). P-values: \* < 0.05, \*\* < 0.01, \*\*\* < 0.001. Morphology of (B) undifferentiated HOG and (C) HOG differentiated with N2.1 medium, (D) N2.2 medium and (E) T3. Scale bar = 50  $\mu$ m.

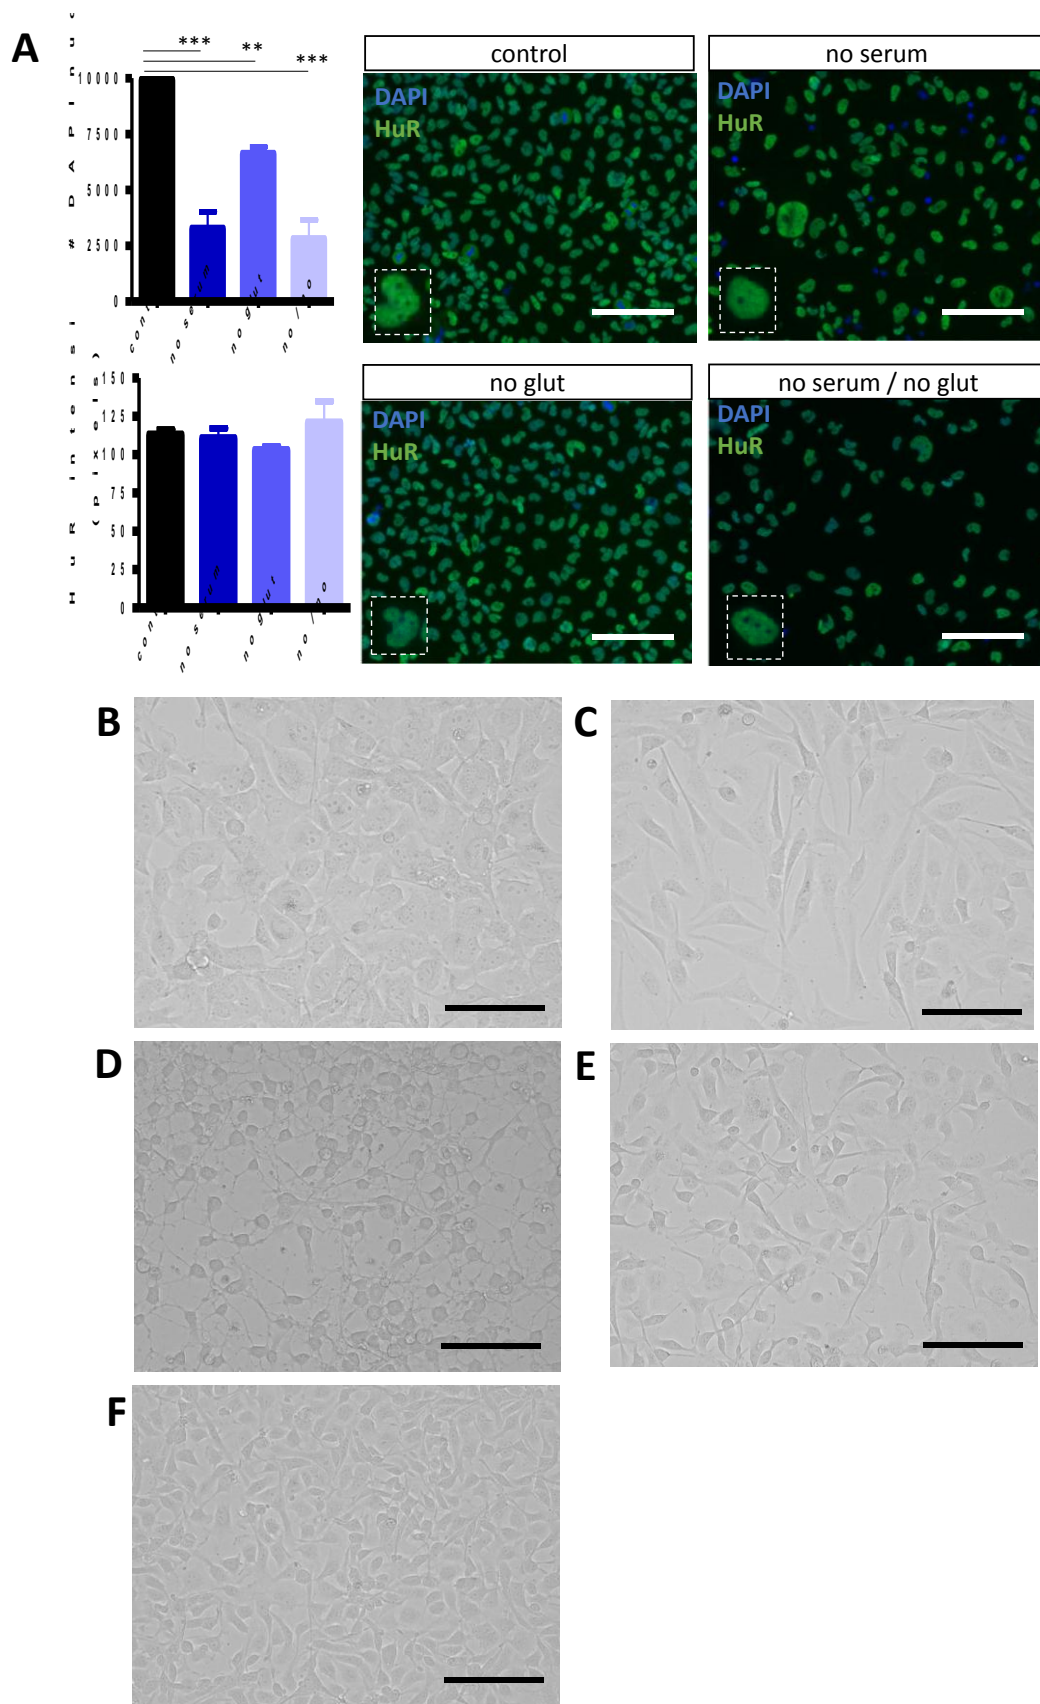

**Figure S2.** (A) MO3.13 cell count (#DAPI nuclei), cytoplasmic HuR intensity quantifications and representative immunocytochemistry images of MO3.13 cells cultured without serum, without Glutamax (glutamine) and without serum and Glutamax. Based on ANOVA with Tukey-b post-hoc comparisons on four independent experiments (n=4). P-values: \* < 0.05, \*\* < 0.01, \*\*\* < 0.001. Morphology of (B) undifferentiated MO3.13 and differentiated with (C) PMA, (D) N2.1 medium, (E) N2.2 medium and (F) T3. Scale bar = 50  $\mu$ m.

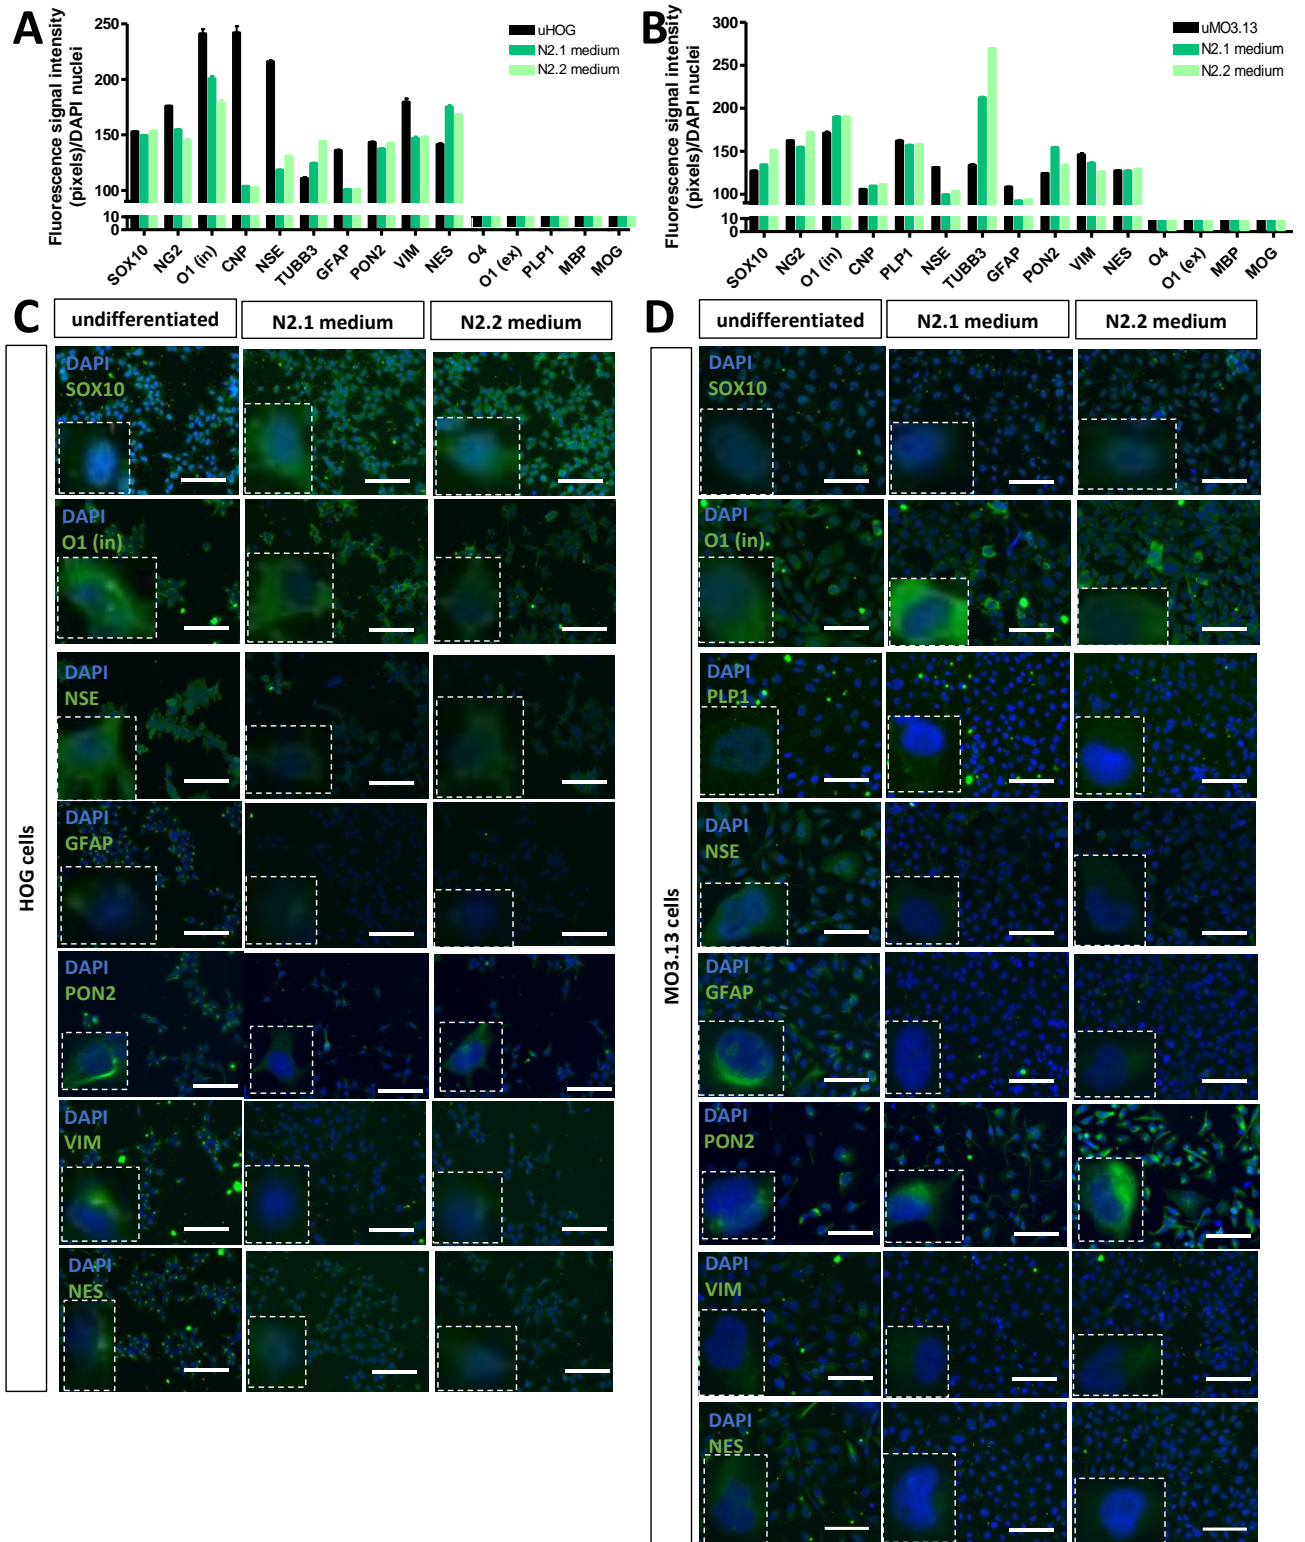

**Figure S3.** Immunocytochemical analyses in undifferentiated and differentiated HOG and MO3.13 cells. **(A)** Quantification of fluorescence signal in immunocytochemistry for undifferentiated HOG cells (uHOG) and HOG cells differentiated with N2.1 or N2.2 medium. Fluorescence quantification was based on one experiment (n=1), error bars = SEM of total number of DAPI-positive nuclei in one condition. **(B)** Quantification of fluorescence signal in immunocytochemistry for undifferentiated MO3.13 cells (uMO3.13) and MO3.13 cells differentiated with N2.1 or N2.2 medium. Fluorescence quantification was based on one experiment (n=1), error bars = SEM of total number of DAPI-positive nuclei in one condition. **(C)** Representative immunocytochemistry images for each marker in HOG cells and **(D)** MO3.13 cells. Scale bar = 50  $\mu$ m.

**Table S1.** Variables and operationalisations used for SH-SY5Y and HOG or SH-SY5Y and MO3.13 co-culture experiments. OL: oligodendrocyte.

| <b>Variable</b>                                                              | <b>Operationalisation</b>                                                                                                                                                                                                                                                                                                                                                                                                                                                                                |
|------------------------------------------------------------------------------|----------------------------------------------------------------------------------------------------------------------------------------------------------------------------------------------------------------------------------------------------------------------------------------------------------------------------------------------------------------------------------------------------------------------------------------------------------------------------------------------------------|
| Coating                                                                      | - Matrigel 1:100 (Corning)<br>- Poly-L-ornithine (Sigma) + Laminin (Sigma)                                                                                                                                                                                                                                                                                                                                                                                                                               |
| Total cell density                                                           | - $2.8 \cdot 10^5$ cells/cm <sup>2</sup><br>- $2.25 \cdot 10^5$ cells/cm <sup>2</sup><br>- $1.8 \cdot 10^5$ cells/cm <sup>2</sup><br>- $1.125 \cdot 10^5$ cells/cm <sup>2</sup><br>- $5.6 \cdot 10^4$ cells/cm <sup>2</sup><br>- $2.8 \cdot 10^4$ cells/cm <sup>2</sup>                                                                                                                                                                                                                                  |
| OL to neuron ratio                                                           | - 1:1<br>- 1:2<br>- 1:3<br>- 1:6<br>- 1:9<br>- 1:18                                                                                                                                                                                                                                                                                                                                                                                                                                                      |
| Co-culture duration                                                          | - 8 days<br>- Longer than 8 days                                                                                                                                                                                                                                                                                                                                                                                                                                                                         |
| Pre-differentiation of OLs in mono-culture                                   | - Yes<br>- No                                                                                                                                                                                                                                                                                                                                                                                                                                                                                            |
| Time-point of OL addition after neuronal differentiation initiation (day 10) | - Day 10<br>- Day 11<br>- Day 14<br>- Day 17<br>- Day 19<br>- Day21                                                                                                                                                                                                                                                                                                                                                                                                                                      |
| Medium change mode                                                           | - 100% of medium<br>- 50% of medium                                                                                                                                                                                                                                                                                                                                                                                                                                                                      |
| Basal differentiation medium                                                 | - Neurobasal (Thermo Fisher)<br>- Brainphys (STEMCELL technologies)                                                                                                                                                                                                                                                                                                                                                                                                                                      |
| Medium supplements                                                           | - D-Glucose (Merck)<br>- Sodium pyruvate (Gibco)<br>- Glutamax (Gibco)<br>- B27 supplement (Thermo Fisher)<br>- SM1 supplement (STEMCELL technologies)<br>- Culture-one supplement (Thermo Fisher)                                                                                                                                                                                                                                                                                                       |
| Proteins/hormones                                                            | - Brain-derived neurotrophic factor (BDNF) (Sigma)<br>- All-trans retinoic acid (ATRA) (Sigma)<br>- Apo-transferrin (Sigma)<br>- Putrescine (Sigma)<br>- Triiodothyronine (T3) (Sigma)<br>- Sodium selenite (Sigma)<br>- Dibutyryl-cAMP (Sigma)<br>- Progesterone (Sigma)<br>- Human insulin (Sigma)<br>- Hydrocortisone (Sigma)<br>- D-biotin (Sigma)<br>- L-Glutamic Acid (Sigma)<br>- IBMX (Sigma)<br>- Ascorbic acid (Sigma)<br>- N-acetyl-cysteine (NAC) (Sigma)<br>- IGF-1 (Cell Guidance Systems) |

|                 |                            |                      |
|-----------------|----------------------------|----------------------|
|                 | - PMA (Sigma)              |                      |
|                 | - Lithium chloride (LiCl)  |                      |
|                 | - Sodium chloride (NaCl)   |                      |
|                 | - Potassium chloride (KCl) |                      |
| Small molecules | - Miconazole (Sigma)       | - Bradykinin (Sigma) |
|                 | - Montelukast (Tebu-Bio)   | - Prosaptide (Sigma) |
|                 | - Clobetasol (Sigma)       | - Carbachol (Sigma)  |
|                 | - MDL29,951 (Tebu-Bio)     | - ATP (Sigma)        |

**Table S2.** Vendors and concentrations of antibodies used in immunohistochemistry (ICC) and Western blot (WB) experiments.

| Target              | Vendor(clone)                                                   | Dilution<br>for ICC | Dilution<br>for WB |
|---------------------|-----------------------------------------------------------------|---------------------|--------------------|
| CC1                 | Abcam (16794)                                                   | 1:500               |                    |
| CNPase              | Aves Labs                                                       | 1:250               | 1:500              |
| DBH                 | Abcam (ab96615)                                                 | 1:500               |                    |
| FluoroMyelin<br>Red | Thermo Fisher Scientific                                        | 1:100               |                    |
| GAPDH               | Cell Signaling Technology (14C10)                               |                     | 1:2000             |
| GAP43               | Aves Labs                                                       | 1:250               |                    |
| GFAP                | UC Davis/NIH NeuroMab Facility<br>(N206A/8)                     | 1:500               |                    |
| HuR                 | Santa Cruz (3A2)                                                | 1:200               |                    |
| Jagged1             | Santa Cruz (E-12)                                               | 1:500               |                    |
| L1CAM               | Santa Cruz (5G3)                                                | 1:500               |                    |
| MBP                 | Aves labs (polyclonal)                                          | 1:500               | 1:2000             |
| MBP                 | Millipore (SMI99; monoclonal)                                   | 1:500               | 1:500              |
| MOG                 | Home-made antibody CRICM,<br>Pitié-Salpêtrière, Hospital, Paris | 1:50                | 1:1000             |
| MPZ                 | Aves Labs                                                       | 1:250               |                    |
| NEFL                | Santa Cruz (DA2)                                                | 1:500               |                    |
| NES                 | Millipore (MAB353)                                              | 1:500               |                    |
| NG2                 | Abcam (ab129051)                                                | 1:100               |                    |
| NSE                 | Aves Labs                                                       | 1:250               |                    |
| O1                  | Invitrogen                                                      | 1:250               |                    |
| O4                  | Home-made antibody CRICM,<br>Pitié-Salpêtrière, Hospital, Paris | 1:2                 |                    |
| PLP1                | Abcam (ab28486)                                                 | 1:500               | 1:2000             |
| PON2                | Santa Cruz (C-5)                                                | 1:500               | 1:250              |
| SOX10               | Abcam (EPR4007)                                                 | 1:100               |                    |
| TH                  | Millipore (AB152)                                               | 1:500               |                    |
| TUBB3               | Biologend (801201)                                              | 1:1000              | 1:2000             |
| TUBB3               | Biologend (802001)                                              | 1:1000              |                    |
| VIM                 | DSHB (40E-C)                                                    | 1:50                |                    |

**Table S3.** Sequences of primers used in HOG and MO3.13 differentiation experiments. FW: forward primer, RV: reverse primer.

| Gene      | Sequence                    | Gene      | Sequence                     |
|-----------|-----------------------------|-----------|------------------------------|
| BLBP FW   | 5'-GAGACAAAGTGGTCATCAGGACTC | MYRF FW   | 5'-CTTCAGCGTGGTGTCCATGTC     |
| BLBP RV   | 5'-CCATCCAGGCTAACAACAGACTTA | MYRF RV   | 5'-GCAGCAAAGAGGGCTGTATGC     |
| CNP FW    | 5'-GGAGTACGCTCAACAAGATGTGA  | NESFW     | 5'-CGGGCTACTGAAAAGTTCCAG     |
| CNP RV    | 5'-CACAAAGAGGGCAGAGATGGT    | NES RV    | 5'-ACATCTTGAGGTGCGCCAG       |
| DHH FW    | 5'-GCCGTGCTTTGGACATCACTA    | NEFL FW   | 5'-GACCCTGGAAATCGAAGCATG     |
| DHH RV    | 5'-ATCAGCTTTGACCGACACGTG    | NEFL RV   | 5'-TTGATCGTGTCTGCATAGCG      |
| EGR2 FW   | 5'-CACGTCGGTGACCATCTTTC     | PDGFRa FW | 5'-GCCCCGAGGAATGGAGTTTTT     |
| EGR2 RV   | 5'-ATCATGCCATCTCCGGC        | PDGFRa RV | 5'-GCAGAAAGGTACTGCCTTTCGA    |
| EIF4A2 FW | 5'-GGTGACATGGACCAGAAGGAGA   | PLP FW    | 5'-GCTGATGCCAGAATGTATGGTG    |
| EIF4A2 RV | 5'-CCCCTCTGCCAATTCTGTGAA    | PLP RV    | 5'-CAATCATGAAGGTGAGCAGGG     |
| FGFR3 FW  | 5'- TCCTGCTCTGGGAGATCTTCAC  | PPIA FW   | 5'-CAGGGTTTATGTGTCAGGGTGG    |
| FGFR3 RV  | 5'- TGATCATGTACAGGTCGTGTGTG | PPIA RV   | 5'- CCATTTGTGTTGGGTCCAGC     |
| GAPDH FW  | 5'-GTCATGGGTGTGAACCATGAGA   | SLC1A3 FW | 5'- CTTCTTGGTAACACGGAAAAACC  |
| GAPDH RV  | 5'-GCATGGACTGTGGTCATGAGTC   | SLC1A3 RV | 5'- TGGGTAGGGTGGCAGAACTT     |
| GPR17 FW  | 5'- GAGAGATGCTGAAACTCTCAGC  | SOX10 FW  | 5'-AGGAGAAGGAGGTTGACTGTTGC   |
| GPR17 RV  | 5'- CAGGGAGAAGTTGGTGATCAGAC | SOX10 RV  | 5'-AGGTGCAGCCCCCTCATCTTTC    |
| GFAP FW   | 5'-CCAGGACCTGCTCAATGTCAA    | TUBB3 FW  | 5'-GGGAAGTCATCAGTGATGAGCAT   |
| GFAP RV   | 5'-TCCAGGCTGGTTTCTCGAATC    | TUBB3 RV  | 5'-GAGGCACGTACTTGTGAGAAGAGG  |
| MAG FW    | 5'-CCAGGGAGCCATCGAC         | VCAN FW   | 5'- GAATGTCACTCTAATCCCTGTCGT |
| MAG RV    | 5'-GGTTGTCCCCTGCCGAG        | VCAN RV   | 5'- TCACATGTCTCGGTATCTTGCTC  |
| MOBP FW   | 5'-CCGTTACCTTCCTCAATTCC     | VEGF-A FW | 5'-GCTCAGAGCGGAGAAAGCATT     |
| MOBP RV   | 5'-GCTGGTTCTGGTCTTCTGGC     | VEGF-A RV | 5'-TCGGCTTGTACATCTGCAAG      |
| MOG FW    | 5'-TTTTGATCCCCACTTTCTGAGG   | VEGF-C FW | 5'-GGGCCAACCGAGAATTTGA       |
| MOG RV    | 5'-CGTAGCTCTTCAAGGAATTGCC   | VEGF-C RV | 5'-GCCGTCTGTAACAGCTGCATGT    |
| MBP FW    | 5'-ACCCAAGATGAAAACCCCGTA    | VIM FW    | 5'-GAAATGGCTCGTCACCTTCGT     |
| MBP RV    | 5'-TCCGTAGCCAAATCCTGGTCT    | VIM RV    | 5'-GGAAGAGGCAGAGAAATCCTGC    |
| MPZ FW    | 5'-TGCAGAGGAGGCTCAGTGCTAT   | YWHAZ FW  | 5'-CGCTGGTGATGACAAGAAAGG     |
| MPZ RV    | 5'-CCTTGGCCTTCTTCTCACTGAC   | YWHAZ RV  | 5'-GAAGTTAAGGGCCAGACCCAGT    |

**Table S4.** Differentiation studies in HOG and MO3.13 cells. ↓: a decreased expression relative to undifferentiated cells was reported. ↑: an increased expression relative to undifferentiated cells was reported. X: an absence of expression was reported. √: a presence of expression was reported.

|                     | HOG                                             |                                                 | MO3.13                                             |                                                                                                          |
|---------------------|-------------------------------------------------|-------------------------------------------------|----------------------------------------------------|----------------------------------------------------------------------------------------------------------|
|                     | Undifferentiated                                | Differentiated                                  | Undifferentiated                                   | Differentiated                                                                                           |
| NG2                 |                                                 |                                                 |                                                    | ↓ protein [25,34]                                                                                        |
| PDGFR $\alpha$      |                                                 | ↓ protein [25]                                  |                                                    | ↓ protein [25,12]                                                                                        |
| Gangliosides (A2B5) | √ lipid [24]                                    | √ lipid [24]                                    | √ lipid [73]                                       |                                                                                                          |
| Olig2               |                                                 |                                                 | √ protein [59]                                     | ↑ mRNA [43]<br>↑ protein [43]<br>√ protein [59]                                                          |
| CNPase              | √ mRNA [14]<br>√ protein [14]<br>X protein [24] | √ mRNA [14]<br>↑ protein [24]                   | √ mRNA [14]<br>√ protein [14,73,60]<br>X mRNA [35] | √ mRNA [14]<br>↑ mRNA [35]<br>↑ protein [34]                                                             |
| GalC (O1)           | √ lipid [25,14]<br>X lipid [24]                 | ↑ lipid [24]<br>√ lipid [25]                    | √ lipid [14,25,73]                                 | √ lipid [25]                                                                                             |
| Sulfatide (O4)      |                                                 |                                                 | √ lipid [73]                                       |                                                                                                          |
| CC1                 |                                                 |                                                 |                                                    | √ ? [49]                                                                                                 |
| CGT                 |                                                 |                                                 |                                                    | ↑ protein [12]                                                                                           |
| FynKinase           |                                                 | ↑ mRNA [7]                                      |                                                    | ↑ mRNA [7]                                                                                               |
| OSP                 |                                                 |                                                 | √ protein [60]                                     |                                                                                                          |
| GST-p               |                                                 |                                                 |                                                    | ↑ protein [53,54]                                                                                        |
| MBP                 | √ protein [14]<br>X protein [24]                | ↑ mRNA [14]<br>↑ protein [14]<br>X protein [24] | √ mRNA [14,35]<br>√ protein [14,73,37,59]          | ↑ mRNA [14]<br>↑ mRNA [43,35]<br>↑ protein [27,34,73,60,43]<br>√ protein [37,40,38,59,47,50]<br>√ ? [49] |
| PLP1                | X protein [18,21]                               | ↑ protein [21,18,20]                            | √ protein [60]                                     | ↑ protein [34,12]                                                                                        |
| OMG                 |                                                 | ↑ mRNA [14]                                     |                                                    |                                                                                                          |
| MOBP                |                                                 | ↑ mRNA [7,14]                                   |                                                    | ↑ mRNA [7]                                                                                               |
| MOG                 |                                                 | ↑ mRNA [14]                                     |                                                    | ↑ mRNA [14]<br>√ protein [40, 50]                                                                        |
| MAG                 |                                                 | ↑ mRNA [14]                                     | √ protein [60]                                     | ↑ protein [34]                                                                                           |
| VIM                 |                                                 |                                                 | √ protein [73]                                     |                                                                                                          |
| S100B               |                                                 |                                                 |                                                    | ↓ protein [34]                                                                                           |
| GFAP                | X protein [14]                                  |                                                 | X protein [14,59]<br>√ protein [37]                | ↓ protein [34,37]<br>X protein [59]                                                                      |

|                                |                |                   |  |                |
|--------------------------------|----------------|-------------------|--|----------------|
| <b>PDGFR<math>\beta</math></b> |                |                   |  | √ protein [47] |
| <b>FGFR1</b>                   |                |                   |  | √ protein [47] |
| <b>FGFR3</b>                   |                |                   |  | √ protein [47] |
| <b>MAL2</b>                    | √ protein [21] | ↑ protein [21,20] |  |                |
